# Supplementary material for: Synthesis of nickel sulphide nanosheets using imidazolium-based chloronickellate ionic liquids as precursors/templates for sunlight-assisted degradation of organic dyes
Source: Royal Society of Chemistry journal article supplement (doi:10.1039/d4nj03928a), 2025-01-01

## Supplementary Information

### **Synthesis of Nickel Sulphide Nanosheets using Imidazolium Based Chloronickellate Ionic Liquids as Precursor/Template for Sunlight Assisted Degradation of Organic Dyes**

*Sukanya Das, Debanga Bhusan Bora, Sangeeta Kalita, Niharika Kashyap and Ruli Borah\**

#### **Contents**

**Fig. S1:** UV–vis spectra of (A) **2a** and (B) **2b** (page 2)

**Fig. S2:** (A) EPR spectra of radical adducts trapped by TEMPO ( $h^+$ ) at the start of MB degradation (0 min) (page 3)

**Fig. S2:** (B) EPR spectra of radical adducts trapped by TEMPO ( $h^+$ ) in 15 min after start of the MB degradation (page 4)

**Fig. S3 (A-D):** HR Mass spectra of MB at different time intervals (0, 15, 30 and 60 min) (page 5 & 6)

Spectral data of the ionic liquids (page 7 & 8)

$^1\text{H}$  and  $^{13}\text{C}$  NMR spectra of ionic liquids (page 9-13)

ESI-Mass spectra of the chloronickellate ionic liquids (page 14)

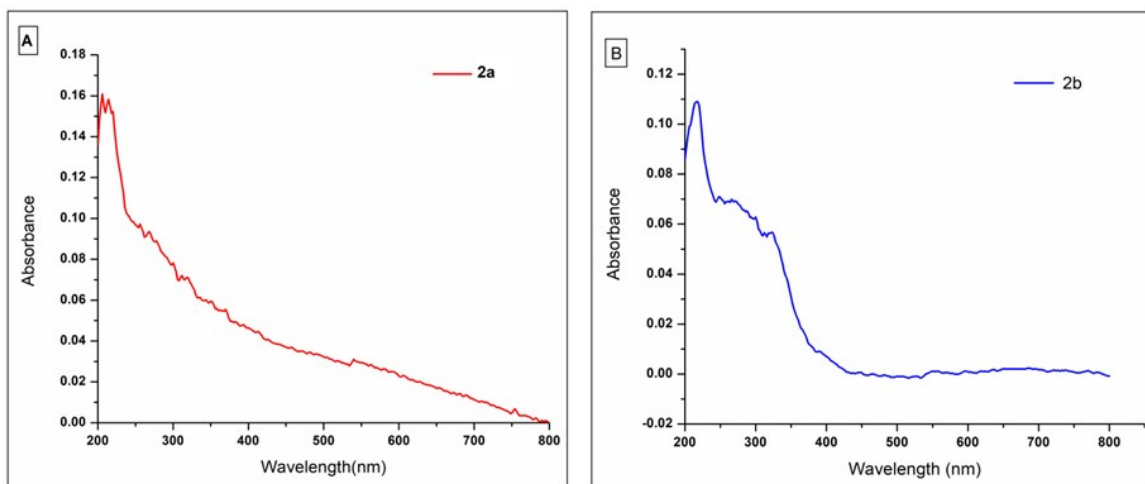

**Fig. S1:** UV-vis spectra of (A) **2a** and (B) **2b**.

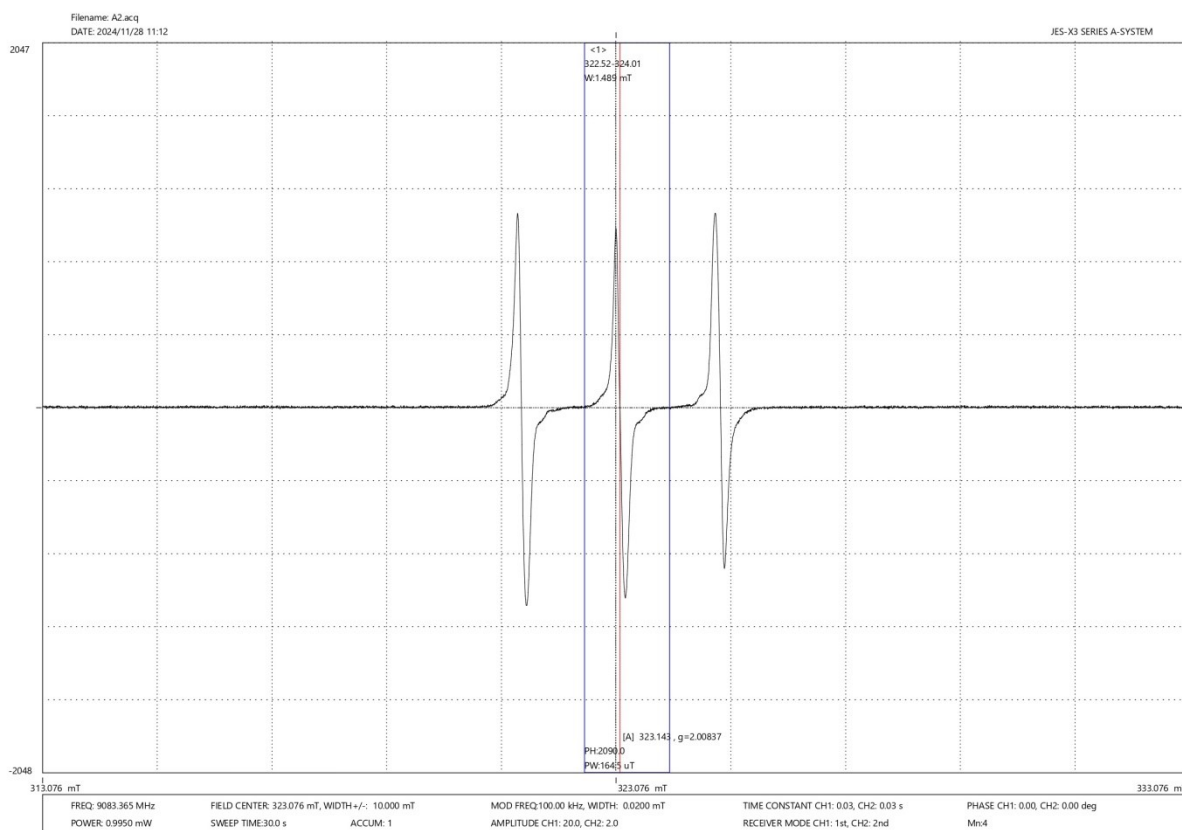

**Fig. S2:** (A) EPR spectra of radical adducts trapped by TEMPO ( $h^+$ ) at the start of the MB degradation (0 min)

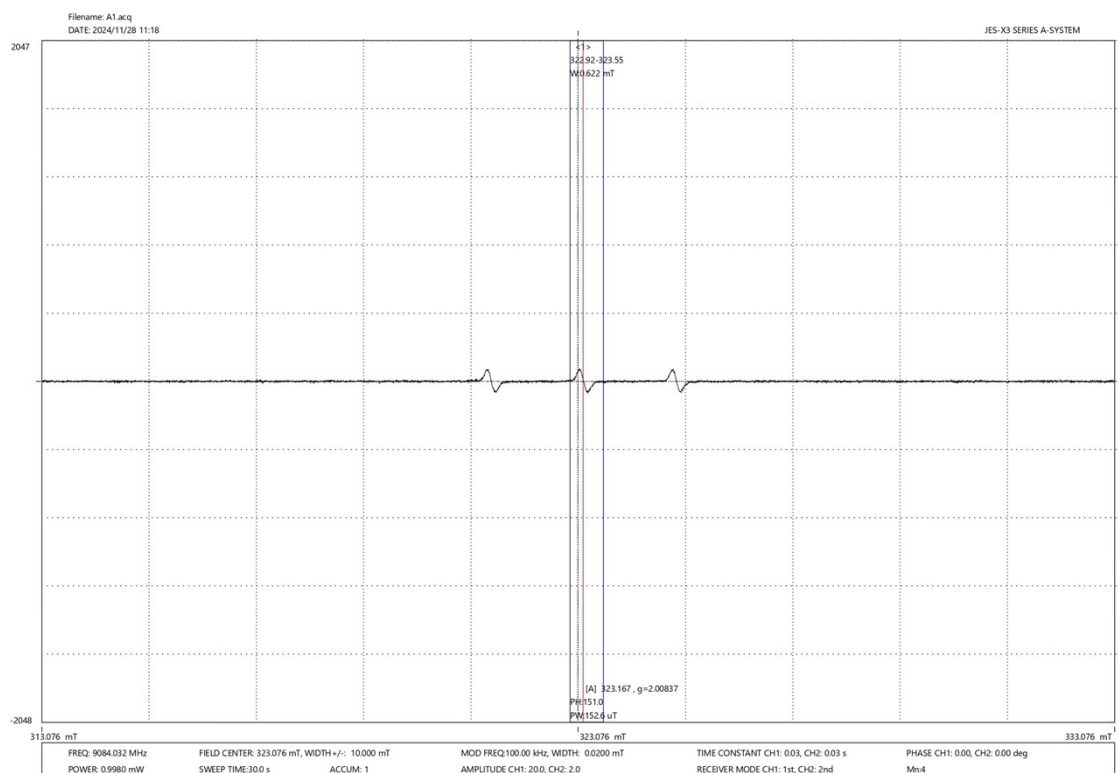

**Fig. S2: (B)** EPR spectra of radical adducts trapped by TEMPO ( $h^+$ ) in 15 min after start of the MB degradation

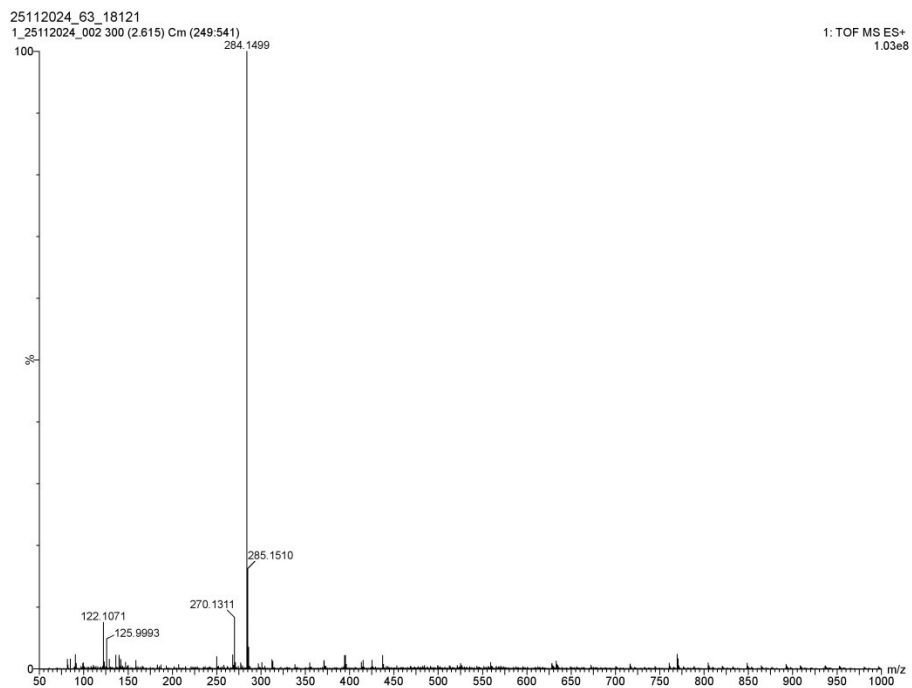

**Fig S3: (A)** HR Mass spectra of methylene blue at time zero minutes.

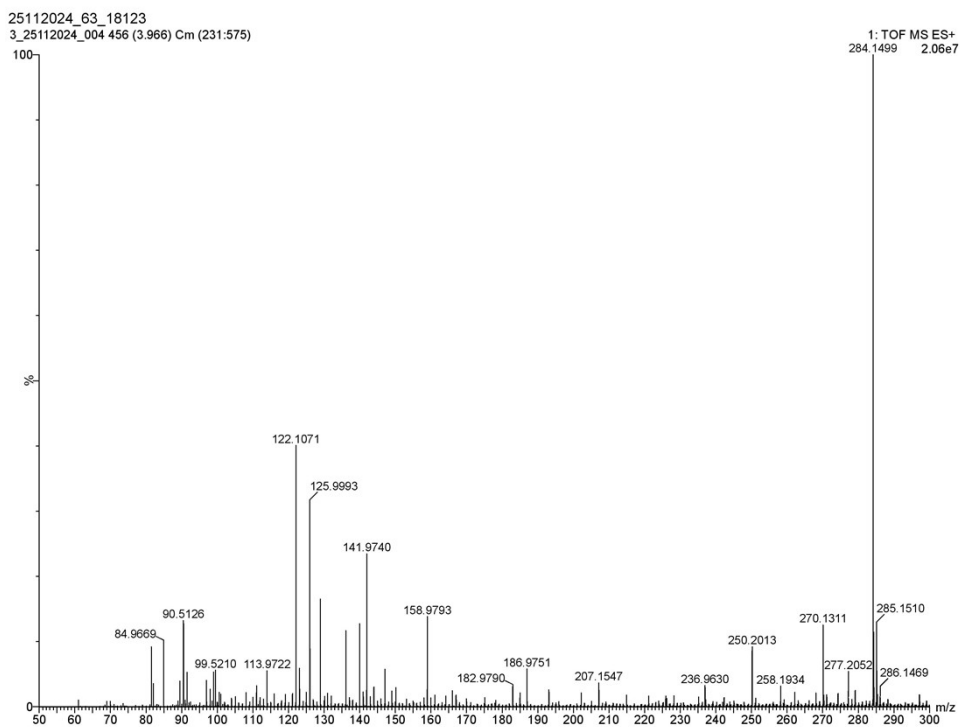

**Fig S3: (B)** HR Mass spectra of methylene blue at time 15 minutes.

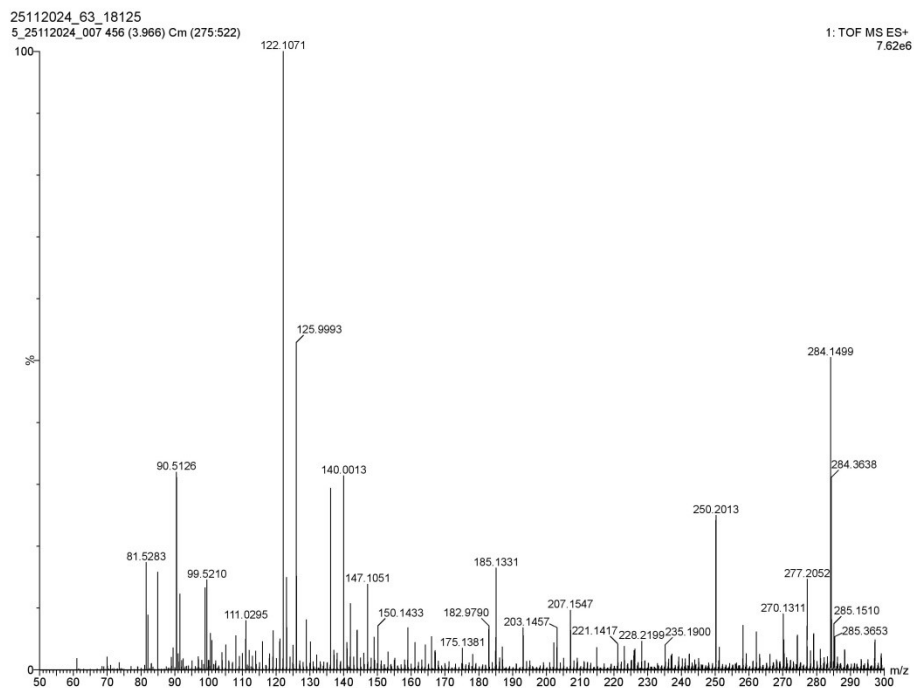

Fig S3: (C) HR Mass spectra of methylene blue at time 30 minutes.

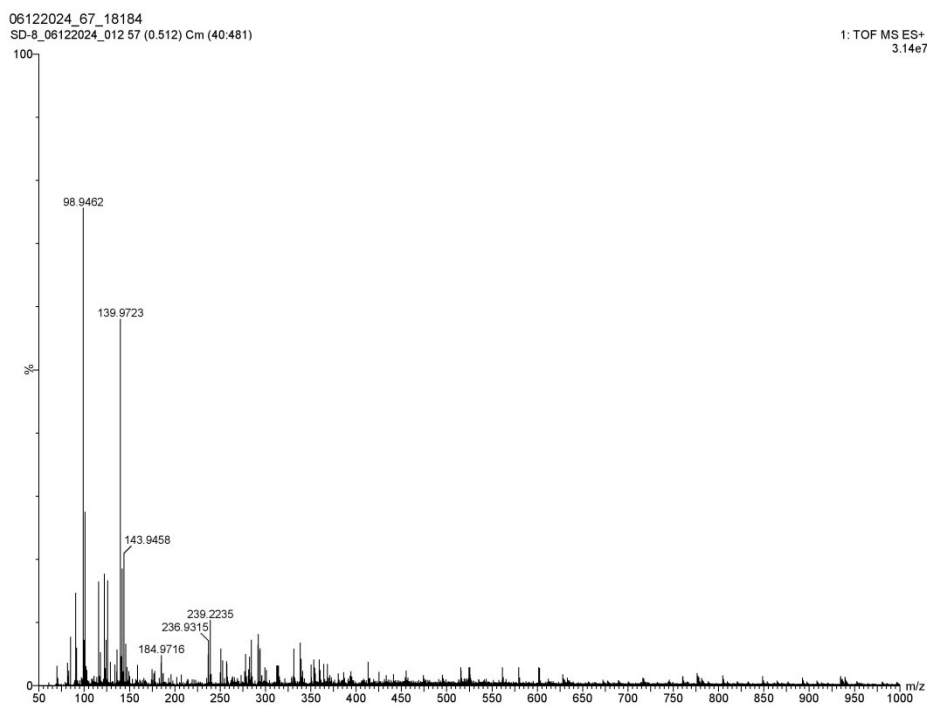

Fig S3: (D) HR Mass spectra of methylene blue at time 60 minutes.

### Spectral data of the ionic liquids

| Sl.No. | Ionic liquid                                                                                                                                                                                         | Spectral data                                                                                                                                                                                                                                                                                                                                                                                                                                                                                                              |
|--------|------------------------------------------------------------------------------------------------------------------------------------------------------------------------------------------------------|----------------------------------------------------------------------------------------------------------------------------------------------------------------------------------------------------------------------------------------------------------------------------------------------------------------------------------------------------------------------------------------------------------------------------------------------------------------------------------------------------------------------------|
| 1      | <div style="text-align: center;"> 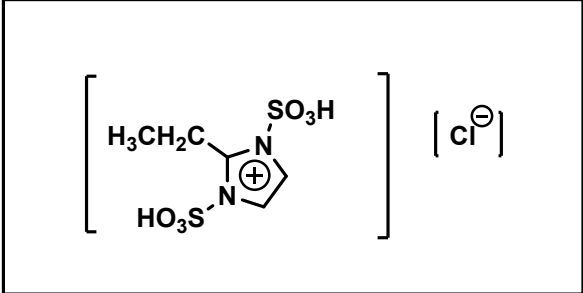 <p>2-ethyl-1,3- disulfoimidazolium chloride<br/>[EDSIM][Cl]</p> </div>           | <p>Yellow viscous liquid; FT-IR (KBr) <math>\nu</math> <math>\text{cm}^{-1}</math> : 3437, 2929, 2860, 1629, 1453, 1176, 1054, 872, 750, 581; <math>^1\text{H}</math> NMR (DMSO-<math>d_6</math>, 400 MHz): <math>\delta</math> 13.94 (s, 1H) 13.00 (s, 1H), 7.47-7.42 (m,2H), 2.88-2.84 (m, 2H), 1.24-1.17 (m, 3H); <math>^{13}\text{C}</math> NMR (DMSO-<math>d_6</math>, 100 MHz): <math>\delta</math> 149.1, 119.1, 19.2 and 11.7.</p>                                                                                 |
| 2      | <div style="text-align: center;">  <p>2-ethyl-1,3- disulfoimidazolium<br/>chloronickellate (<b>1a</b>)</p> </div> | <p>Light green paste; FT-IR (KBr) <math>\nu</math> <math>\text{cm}^{-1}</math>: 3424, 2929, 2855, 1622, 1543, 1462, 1171, 1063, 875, 753 and 579; <math>^1\text{H}</math> NMR (DMSO-<math>d_6</math>, 400 MHz): <math>\delta</math> 13.95 (s, 1H) 12.96 (s, 1H), 7.47-7.42 (m,2H), 2.90-2.79 (m, 2H), 1.26-1.17 (m, 3H); <math>^{13}\text{C}</math> NMR (DMSO-<math>d_6</math>, 100MHz): <math>\delta</math> 149.1, 118.4, 19.6 and 11.3. ESI-HRMS <math>m/z</math>: 751.2576, 735.2849, 721.2721, 719.3081, 701.4686.</p> |
| 3      | <div style="text-align: center;">  <p>2-methyl-1,3-disulfoimidazolium chloride<br/>[MDSIM][Cl]</p> </div>         | <p>Yellow viscous liquid; FT-IR (KBr) <math>\nu</math> <math>\text{cm}^{-1}</math>: 3425, 3067, 2917, 1627, 1445, 1191, 1050, 873, 753 and 580; <math>^1\text{H}</math> NMR (DMSO-<math>d_6</math>, 400 MHz): <math>\delta</math> 13.91 (s, 1H), 11.93 (s, 1H), 7.43 (s, 2H), 2.51 (s, 3H); <math>^{13}\text{C}</math> NMR (DMSO-<math>d_6</math>, 100 MHz): <math>\delta</math></p>                                                                                                                                       |

|   |                                                                                                                                                                                                                                                                                                |                                                                                                                                                                                                                                                                                                                                                                                                                                                       |
|---|------------------------------------------------------------------------------------------------------------------------------------------------------------------------------------------------------------------------------------------------------------------------------------------------|-------------------------------------------------------------------------------------------------------------------------------------------------------------------------------------------------------------------------------------------------------------------------------------------------------------------------------------------------------------------------------------------------------------------------------------------------------|
|   |                                                                                                                                                                                                                                                                                                | 144.9, 119.1 and 11.3.                                                                                                                                                                                                                                                                                                                                                                                                                                |
| 4 | <div style="border: 1px solid black; padding: 10px; display: inline-block; margin-bottom: 10px;"> 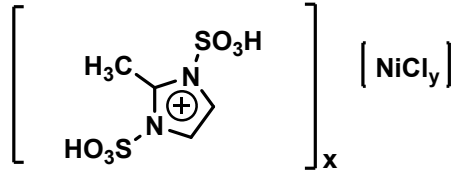 </div> <p style="text-align: center;">2-methyl-1,3-disulfoimidazolium<br/>chloronickellate (<b>1b</b>)</p> | <p>Light green paste; FT-IR (KBr) <math>\nu</math> <math>\text{cm}^{-1}</math>: 3477, 2919, 2865, 1622, 1441, 1194, 1047, 887, 746 and 584; <math>^1\text{H}</math> NMR (DMSO-<math>d_6</math>, 400 MHz) <math>\delta</math> 13.91 (s, 2H) 7.46 (s, 2H), 2.51-2.34 (m, 3H), <math>^{13}\text{C}</math> NMR (DMSO-<math>d_6</math>, 100 MHz): <math>\delta</math> 143.8, 119.4, and 11.3. ESI-HRMS <math>m/z</math>: 905.6121, 717.4169, 679.4618.</p> |



## $^1\text{H}$ and $^{13}\text{C}$ NMR spectra of ionic liquids

### 1. $^1\text{H}$ NMR spectrum of [EDSIM][Cl]

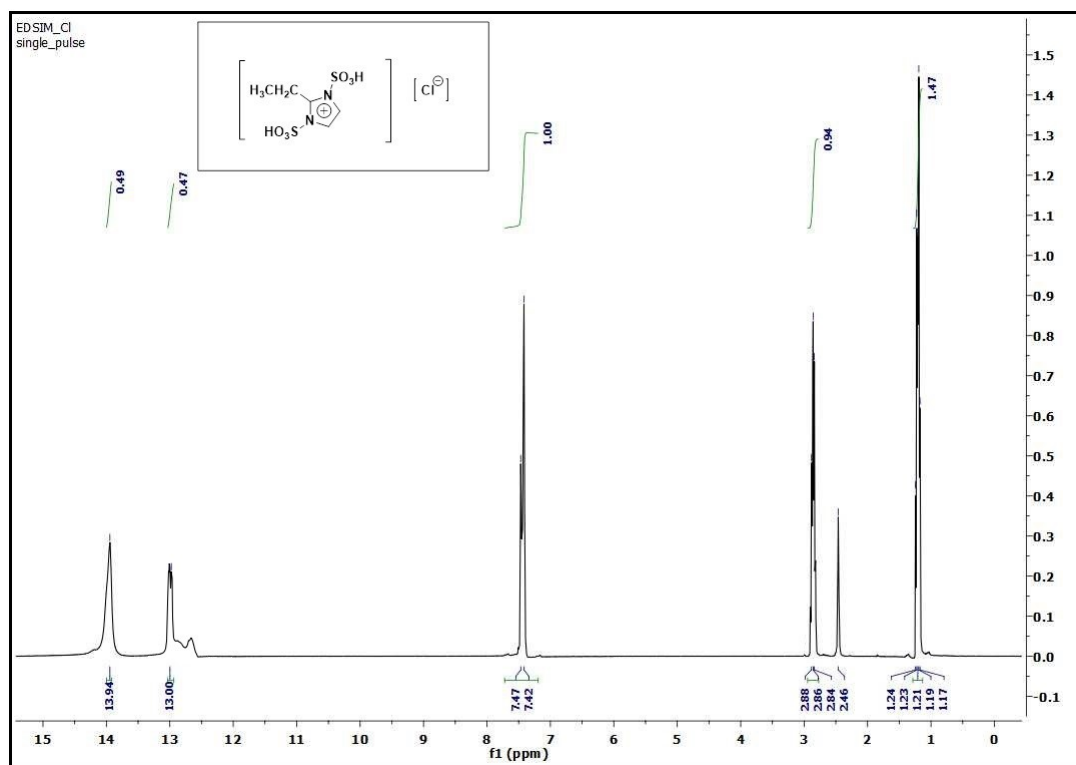

### 2. $^{13}\text{C}$ NMR spectrum of [EDSIM][Cl]

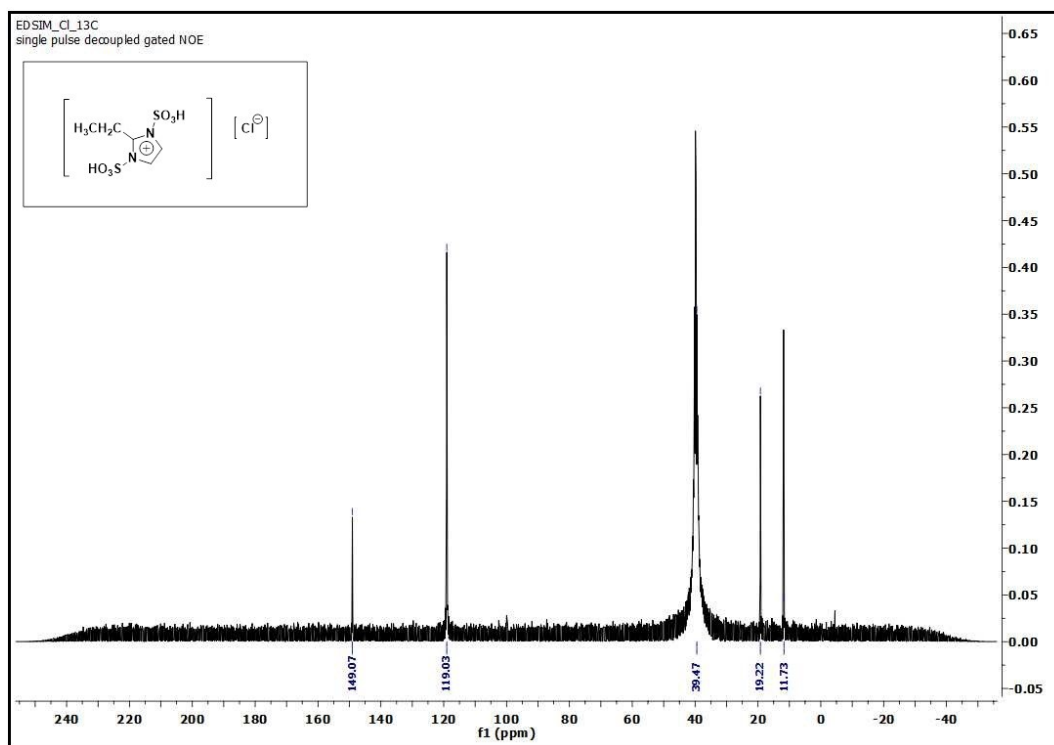

### 3. $^1\text{H}$ NMR spectrum of 1a

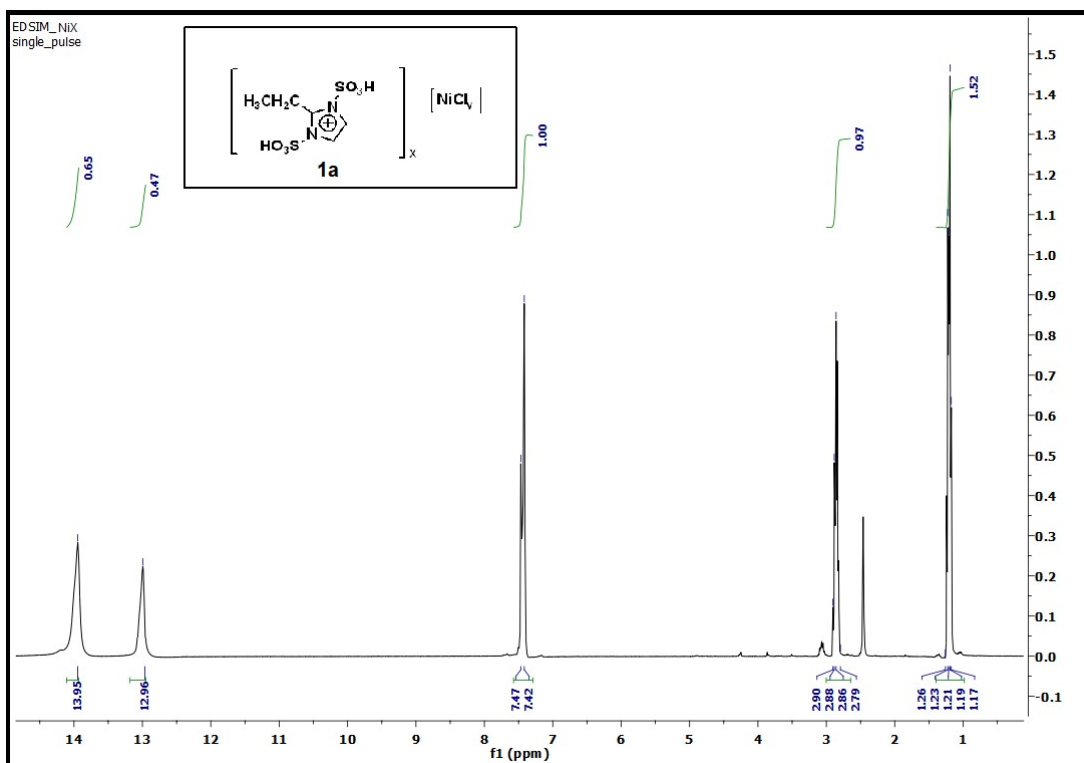

### 4. $^{13}\text{C}$ NMR spectrum of 1a

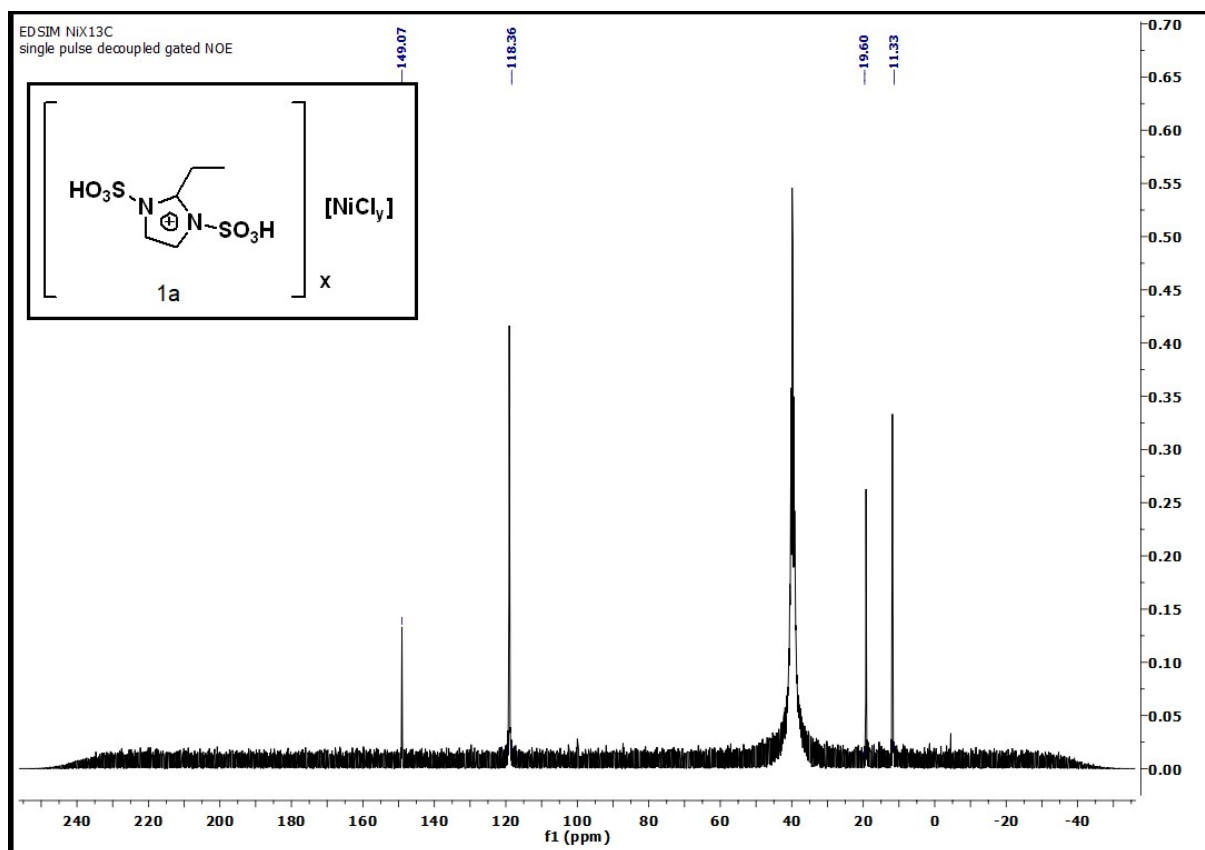

5.  $^1\text{H}$  NMR spectrum of  $[\text{MDSIM}][\text{Cl}]$

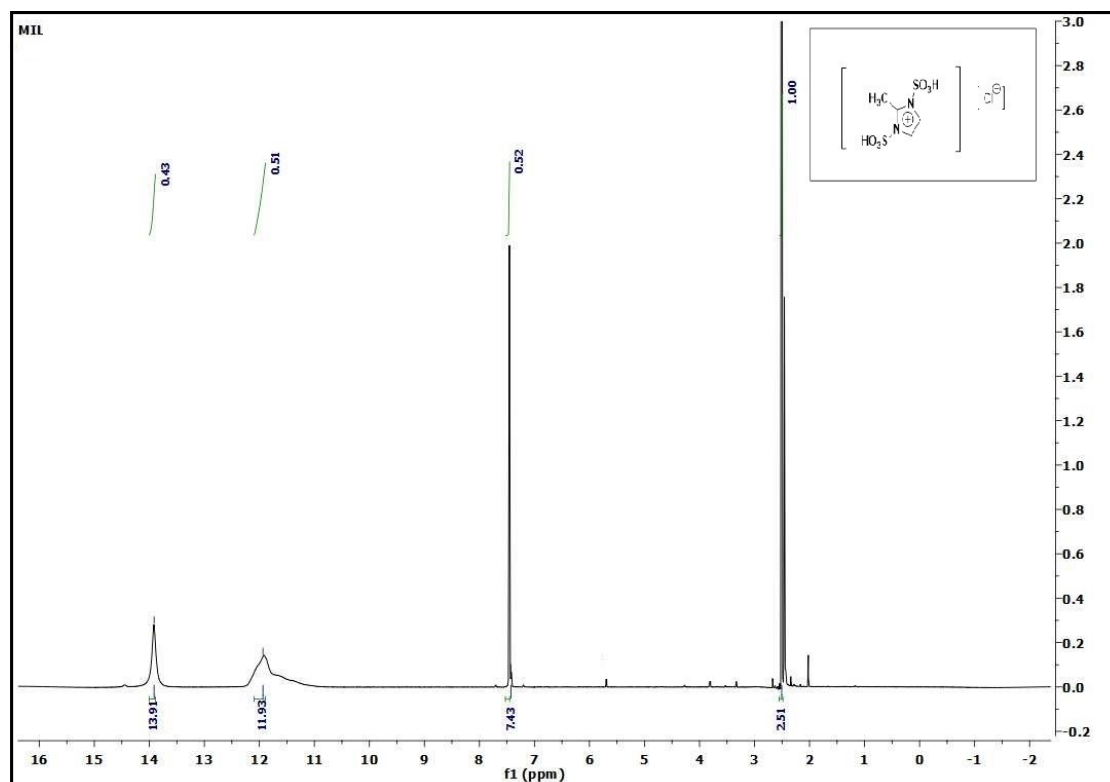

6.  $^{13}\text{C}$  NMR spectrum of  $[\text{MDSIM}][\text{Cl}]$

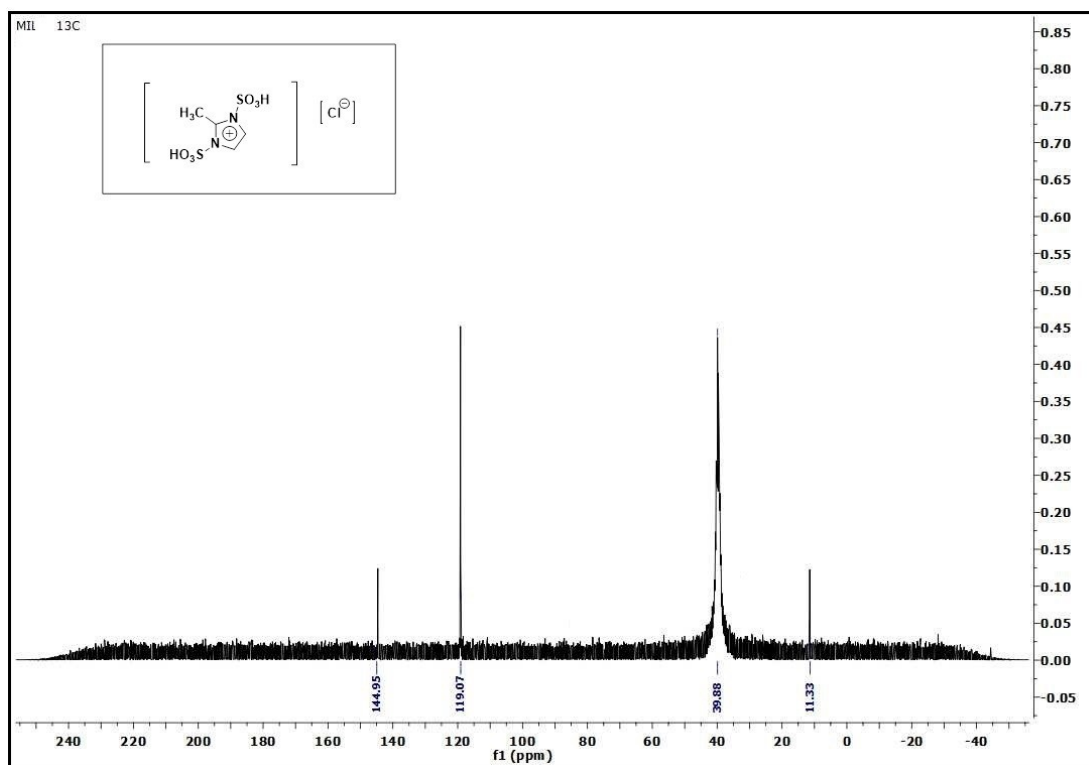

7.  $^1\text{H}$  NMR spectrum of **1b**

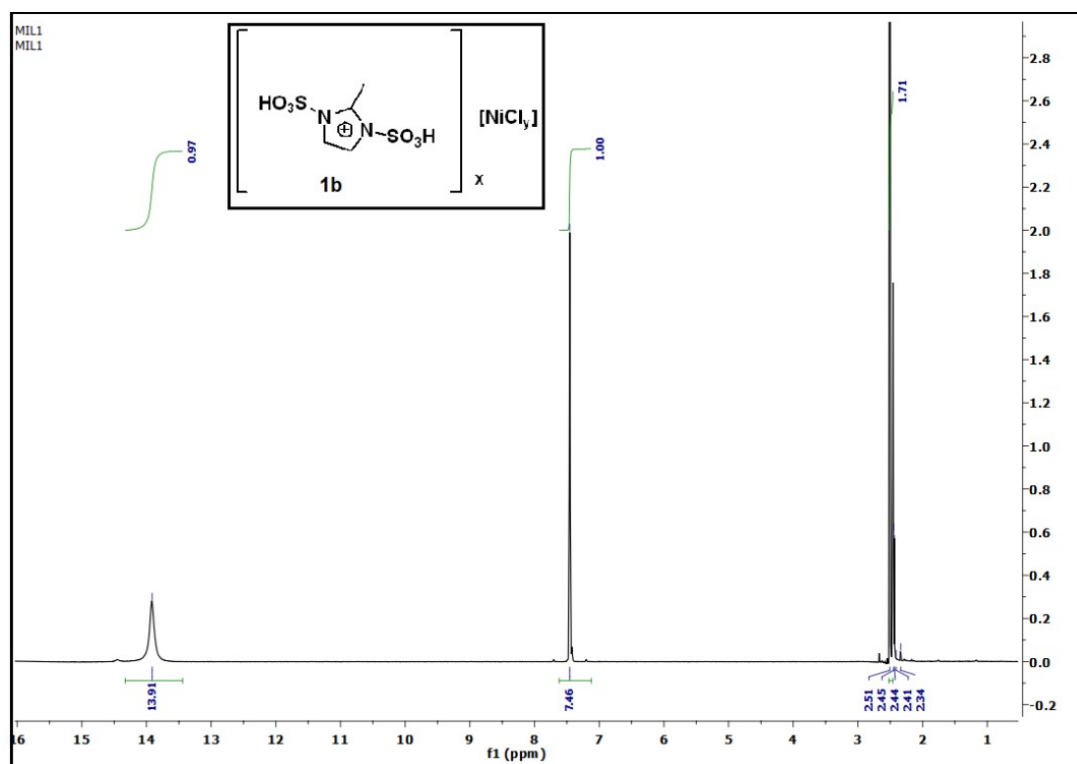

8.  $^{13}\text{C}$  NMR spectrum of **1b**

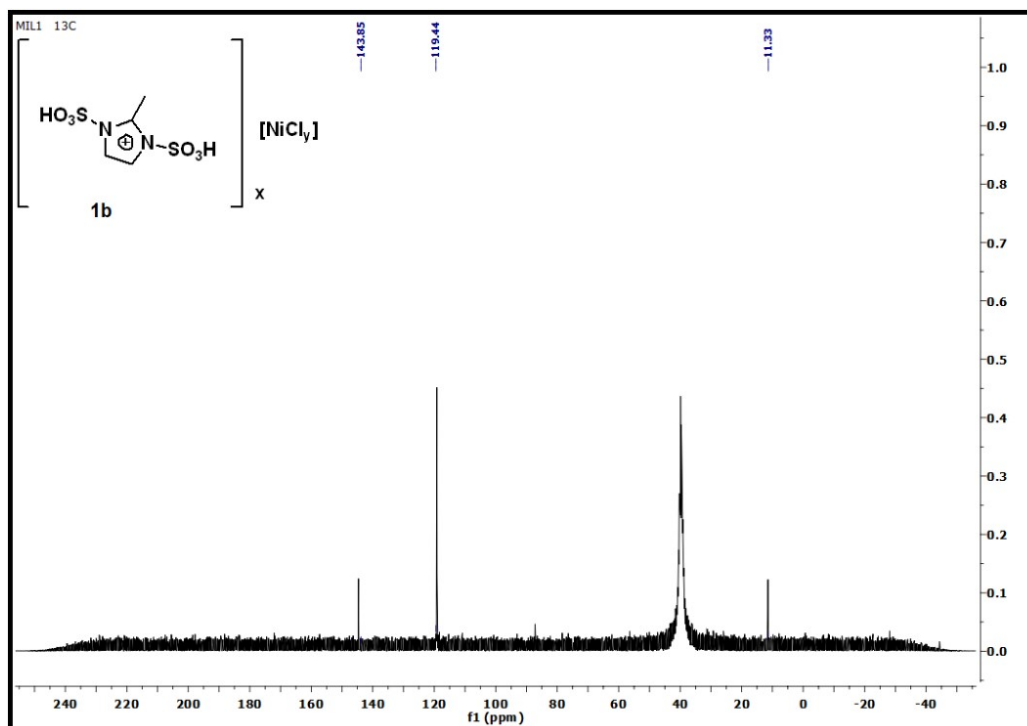

## ESI-Mass spectra of chloronickellate ionic liquids

### 1. ESI-mass spectrum of **1a**

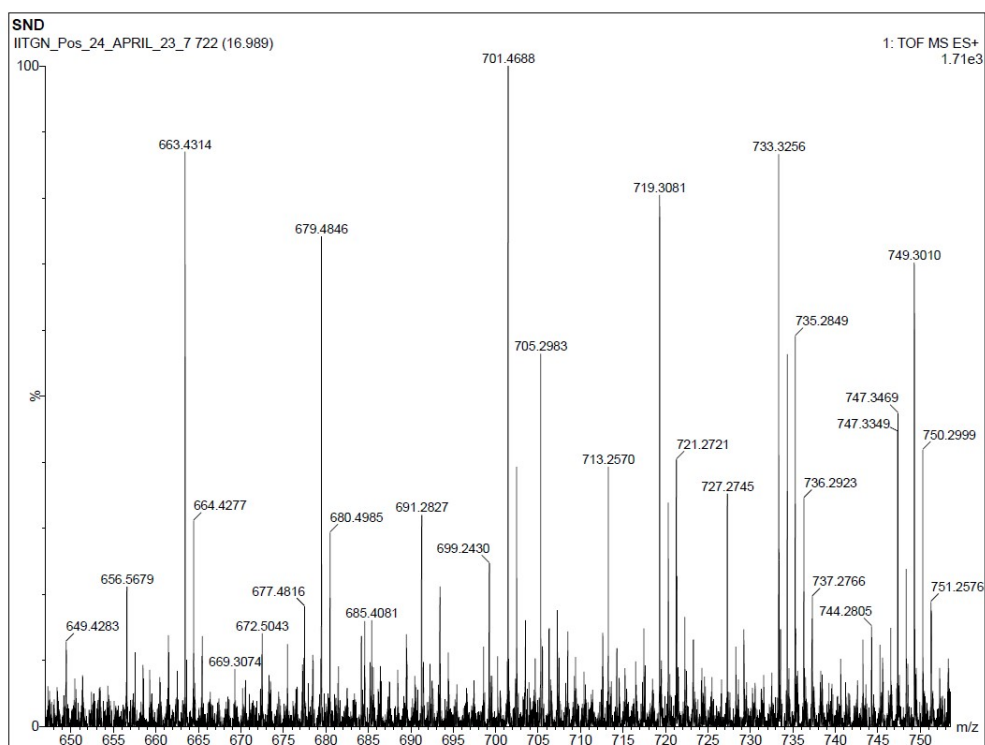

### 2. ESI-mass spectrum of **1b**

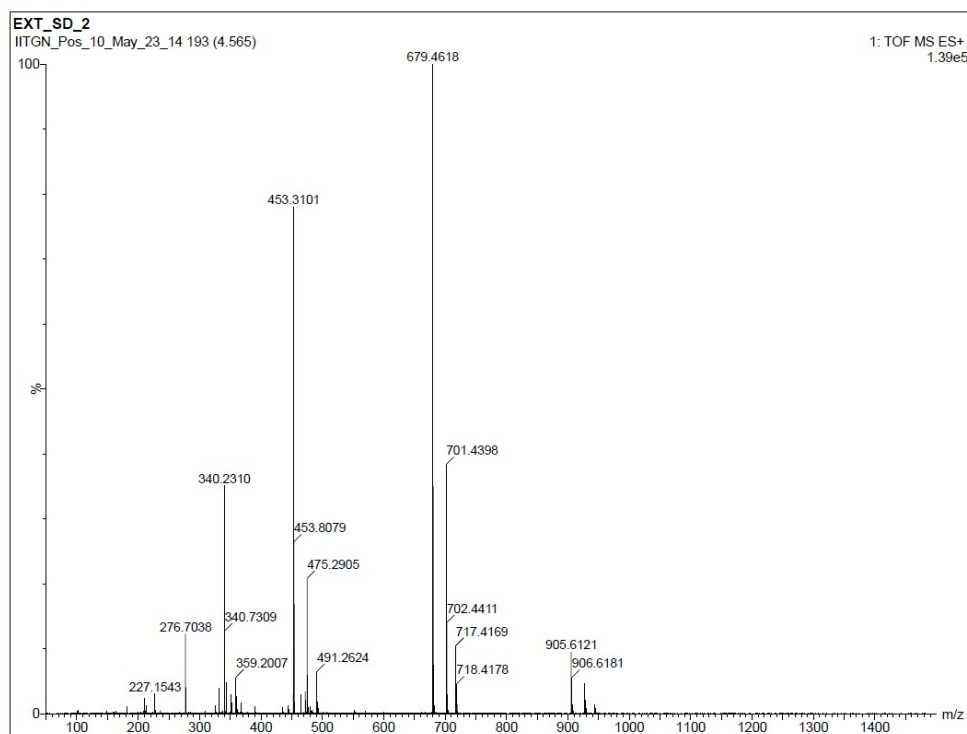

Supplement: d4nj03928a1.pdf [file d4nj03928a1.pdf]
